# Supplementary material for: Assessment of the Correlation and Diagnostic Accuracy between Cerebrospinal Fluid and Plasma Alzheimer’s Disease Biomarkers: A Comparison of the Lumipulse and Simoa Platforms
Source: MDPI journal article supplement (doi:10.3390/ijms25094594), 2024-04-23
Supplement: s1 [file s1]

## **SUPPLEMENTARY DATA**

### **Assessment of the Correlation and Diagnostic Accuracy between CSF and Plasma AD Biomarkers: A Comparison of the Lumipulse and Simoa Platforms**

Farida Dakterzada<sup>1^</sup>, Raffaella Cipriani<sup>2^</sup>, Ricard López-Ortega<sup>3</sup>, Alfonso Arias<sup>1</sup>,  
Iolanda Riba-Llena<sup>1</sup>, Maria Ruiz-Julián<sup>1</sup>, Raquel Huerto<sup>1</sup>, Nuria Tahan<sup>1</sup>, Carlos  
Matute<sup>2,4,5</sup>, Estibaliz Capetillo-Zarate<sup>2,5,6,7^^</sup>, Gerard Piñol-Ripoll<sup>1,8^^\*</sup>

(1) Cognitive Disorders Unit, Cognition and Behaviour Study Group, Santa Maria University Hospital, IRBLleida, Lleida, 25198, Spain

(2) Achucarro Basque Center for Neuroscience, Leioa, 48940, Spain

(3) Laboratori Clínic ICS, Hospital Universitari Arnau de Vilanova, Lleida, 25198, Spain

(4) Department of Neurosciences, Faculty of Medicine and Nursery, University of the Basque Country (UPV/EHU), Leioa, 48940, Spain

(5) CIBERNED, Centro de Investigación Biomédica en Red Enfermedades Neurodegenerativas, Madrid, Spain

(6) Department of Neurosciences, Faculty of Pharmacy, University of the Basque Country (UPV/EHU), Vitoria-Gasteiz, 01008, Spain

(7) IKERBASQUE, Basque Foundation for Science, Bilbao, 48009, Spain

(8) Departament de Medicina Experimental, Facultat de Medicina, Universitat de Lleida (UDL), Spain

**Supplementary Table S1.** Correlation coefficient between CSF AD biomarkers measured by Lumipulse and the same markers quantified in plasma with the Simoa or Lumipulse platforms

|                                            |                                                          | Correlation coefficient | <i>p</i> -value |
|--------------------------------------------|----------------------------------------------------------|-------------------------|-----------------|
| Between Lumipulse CSF and Simoa plasma     | A $\beta$ 42                                             | 0.107                   | 0.238           |
|                                            | A $\beta$ 40                                             | 0.023                   | 0.801           |
|                                            | Ptau181                                                  | 0.363                   | < 0.001         |
|                                            | Ttau                                                     | -0.024                  | 0.79            |
|                                            | A $\beta$ 42/40                                          | 0.211                   | 0.019           |
|                                            | Ptau181/A $\beta$ 42                                     | 0.346                   | < 0.001         |
|                                            | Ttau/A $\beta$ 42                                        | 0.046                   | 0.61            |
|                                            | Simoa Ptau181 & Lumipulse CSF A $\beta$ 42               | -0.269                  | 0.002           |
|                                            | Simoa Ptau181 & Lumipulse CSF A $\beta$ 42/40            | -0.4                    | < 0.001         |
| Between Lumipulse CSF and Lumipulse Plasma | A $\beta$ 42                                             | 0.251                   | 0.005           |
|                                            | A $\beta$ 40                                             | 0.072                   | 0.431           |
|                                            | Ptau181                                                  | 0.33                    | < 0.001         |
|                                            | A $\beta$ 42/40                                          | 0.423                   | < 0.001         |
|                                            | Ptau181/A $\beta$ 42                                     | 0.332                   | < 0.001         |
|                                            | Lumipulse plasma Ptau181 & Lumipulse CSF A $\beta$ 42    | -0.226                  | 0.011           |
|                                            | Lumipulse plasma Ptau181 & Lumipulse CSF A $\beta$ 42/40 | 0.35                    | < 0.001         |
